# Supplementary material for: Missing Genes, Multiple ORFs, and C-to-U Type RNA Editing in Acrasis kona (Heterolobosea, Excavata) Mitochondrial DNA
Source: PubMed Central journal article supplement (PMC4202320; doi:10.1093/gbe/evu180), 2014-08-21
Supplement: supp_evu180_Supp_GBE_No.140527_revise_v2.pdf [file supp_evu180_Supp_GBE_No.140527_revise_v2.pdf]

# Supplementary Information

## Missing Genes, Multiple ORFs and C-to-U Type RNA Editing in *Acrasis kona*

### (Heterolobosea, Excavata) Mitochondrial DNA

Cheng-Jie Fu<sup>\*1</sup>, Sanea Sheikh<sup>1</sup>, Wei Miao<sup>2</sup>, Siv G. E. Andersson<sup>3</sup>, Sandra L. Baldauf<sup>\*1</sup>

<sup>1</sup> Program in Systematic Biology, Department of Organismal Biology, Evolutionary Biology Centre, Uppsala University, Uppsala 75236, Sweden

<sup>2</sup> Key Laboratory of Aquatic Biodiversity and Conservation, Institute of Hydrobiology, Chinese Academy of Sciences, Wuhan 430072, China

<sup>3</sup> Department of Molecular Evolution, Cell and Molecular Biology, Science for Life Laboratory, Biomedical Centre, Uppsala University, Uppsala 75105, Sweden

## Contents

|                                       |           |
|---------------------------------------|-----------|
| <b>A. Supplementary Tables</b> .....  | <b>3</b>  |
| <b>B. Supplementary Figures</b> ..... | <b>9</b>  |
| <b>C. References</b> .....            | <b>19</b> |

## Supplementary Tables List

Table S1. Primers used in this study.

Table S2. Pair-wise sequence identity of mitochondrial protein-coding genes (OXPHOS pathway) in representative discobids.

Table S3. GC content of mtDNA encoded and 11 putative nuclear encoded mitochondrial protein (NcMt) genes in *Acrasis kona*.

Table S4. Posterior predictive tests of compositional heterogeneity in concatenated alignments of 19 mitochondrial proteins.

Table S5. Comparison of 11 putative nuclear DNA encoded mitochondrial proteins (NcMt) in *Acrasis kona* and their counterparts in the *Naegleria* spp. mtDNAs.

## Supplementary Figures List

Figure S1. A schematic map of gap-closing of *Acrasis kona* mtDNA based on long-rang PCR.

Figure S2. Tandemly repeated regions in *Acrasis kona* mtDNA.

Figure S3. Comparison of ribosomal protein operon gene order among representative  $\alpha$ -proteobacteria and jakobids.

Figure S4. A split *rps3* gene in *Acrasis kona* mtDNA.

Figure S5. Assembly coverage plots for the 11 putative nuclear encoded mitochondrial protein (NcMt) genes in the *Acrasis kona* nuclear contigs.

Figure S6. Phylogenies of 11 putative *Acrasis kona* nuclear encoded mitochondrial proteins.

Figure S7. Bayesian phylogeny of the E/E+/DYW domain of the DYW-type PPR proteins.

**Table S1. Primers used in this study.**

| Name                  | Primer (5'-3')              |
|-----------------------|-----------------------------|
| <b>GAP_CLOSE(1-4)</b> |                             |
| GAP1_F1               | TGGGTGCAGCATTTTTAGGACA      |
| GAP1_R1               | TCACATTCACCAGCTTGATCACAT    |
| GAP1_nested_F2        | CATCAATGGTATTGGGGTTATGG     |
| GAP1_nested_R2        | TTGTAGCACATGCAATTACTGGTTT   |
| GAP2_F1               | TGTGATCAAGCTGGTGAATGTGATTT  |
| GAP2_R1               | GCACCTGCACCTTTGGTTTTCC      |
| GAP2_nested_F2        | TGATCAAGCTGGTGAATGTGA       |
| GAP2_nested_R2        | TCCTCCATGCCACTTCCACTTT      |
| GAP3_F1               | GGAAAACCAAAGGTGCAGGTGCT     |
| GAP3_R1               | TGCCCTGTTGTATCTGTTGCTC      |
| GAP3_nested_F2        | TGATAGTCAAGCAGAAAGAGCA      |
| GAP3_nested_R2        | TCTAATATGTTGTTTAATTTTTCACT  |
| GAP4_F1               | GCAACAGATACAACAGGGGCAAGA    |
| GAP4_R1               | CGAACTCCCGACTTTTGGAGTGA     |
| GAP4_nested_F2        | AGAGTGTTAGGTCCAGTATGTACAGA  |
| GAP4_nested_R2        | TGCTTTCTATTATCTTCCAATTTACCT |
| <b>RT-PCR</b>         |                             |
| nad1_est_F1           | TCTGTTCAAAGAAGAAGAGGACCA    |
| nad1_est_R1           | AGCAAACCCATTCCACTAAA        |
| nad1_est_F2           | GCCGATAGCTGATGGTGTAATA      |
| nad1_est_R2           | AAAGCAAAACCCATTCCACT        |
| atp6_est_F1           | TTATTATTTGCACAAGGAG         |
| atp6_est_R1           | TTTGAGAAAATAGTAGATAAAA      |
| atp6_est_F2           | ATTGTTTGCTAATTTAGTGG        |
| atp6_est_R2           | ATCTTTTGAGAAAATAGTAG        |
| cob_est_F1            | TATTATGGTCAAGTGGTGTT        |
| cob_est_R1            | TCTGTATGTGATAAATATTCTGG     |
| cob_est_F2            | TGCATAGTAATGGTGCAAGT        |
| cob_est_R2            | TATTATAACCACCCCATACCCAA     |
| cox3_est_F1           | AGAGAGTGTTAAAGGTTGGTTT      |
| cox3_est_R1           | TGAAATCCATGAAATCCTGTT       |
| cox3_est_F2           | TGTTAGTAGCTTTAATAGAGAGTG    |
| cox3_est_R2           | ACAACCTAATCCCATTATCACAGA    |

**Table S2. Pair-wise sequence identity of mitochondrial protein-coding genes (OXPHOS pathway) in representative discobids.**

| Gene         | Sequence Identity (%) |       |       |       |
|--------------|-----------------------|-------|-------|-------|
|              | Ak/Nf <sup>1</sup>    | Ng/Nf | Ag/Jl | Ra/Ha |
| <i>atp1</i>  | 49.6                  | 93.8  | 73.8  | 86.9  |
| <i>atp3</i>  | 28.8                  | 78.8  | 51.1  | 76.2  |
| <i>atp6</i>  | 45.05                 | 80.4  | 64.2  | 87.1  |
| <i>atp8</i>  | 21.3                  | 77.3  | 28.9  | 74.4  |
| <i>atp9</i>  | 64.6                  | 98.6  | 78.1  | 98.7  |
| <i>cox1</i>  | 59.05                 | 93    | 75    | 89.3  |
| <i>cox2</i>  | 25.4                  | 86.5  | 66.3  | 68.9  |
| <i>cox3</i>  | 30.4                  | 86.5  | 66    | 85    |
| <i>cob</i>   | 44.65                 | 74    | 70.7  | 80.8  |
| <i>nad1</i>  | 43.9                  | 85.3  | 70.4  | 90.1  |
| <i>nad2</i>  | 30.2                  | 59.6  | 47.8  | 80.1  |
| <i>nad3</i>  | 38.8                  | 86.7  | 68.1  | 92.4  |
| <i>nad4</i>  | 51.15                 | 74.7  | 68.9  | 83    |
| <i>nad4L</i> | 43.75                 | 90.8  | 75.5  | 93.1  |
| <i>nad5</i>  | 45.25                 | 75.7  | 63.6  | 87.8  |
| <i>nad7</i>  | /                     | 91.1  | 75.7  | 90.5  |
| <i>nad6</i>  | 30.1                  | 75.1  | 50.5  | 74.6  |
| <i>nad8</i>  | 54.4                  | 91.2  | 78.4  | 90.7  |
| <i>nad9</i>  | /                     | 74.2  | 46.3  | 74.5  |
| <i>nad11</i> | 31.25                 | 62.9  | 52.8  | 72.3  |

<sup>1</sup>: Ak: *Acrasis kona*; Ng: *Naegleria gruberi*; Nf: *Naegleria fowleri*; Ag: *Andalucia godoyi*; Ha: *Histiona aroides*; Jl: *Jakoba libera*; Ra: *Reclinomonas americana*.

**Table S3. GC content of mtDNA encoded and 11 putative nuclear encoded mitochondrial protein (NcMt) genes in *Acrasis kona*.**

| mtDNA<br>encoded<br>proteins | Length<br>(aa) | GC    | GC1   | GC2   | GC3   | ncDNA<br>encoded<br>proteins | Length<br>(aa) | GC    | GC1   | GC2   | GC3   |
|------------------------------|----------------|-------|-------|-------|-------|------------------------------|----------------|-------|-------|-------|-------|
| <i>ORF149</i>                | 149            | 0.116 | 0.134 | 0.141 | 0.074 | <i>RPS10</i>                 | 227            | 0.398 | 0.445 | 0.33  | 0.419 |
| <i>ORF603</i>                | 603            | 0.102 | 0.109 | 0.134 | 0.061 | <i>RPL11</i>                 | 200            | 0.395 | 0.485 | 0.400 | 0.300 |
| <i>ORF246</i>                | 246            | 0.081 | 0.061 | 0.114 | 0.069 | <i>RPL2</i>                  | 256            | 0.422 | 0.488 | 0.461 | 0.316 |
| <i>ORF802</i>                | 802            | 0.086 | 0.105 | 0.103 | 0.051 | <i>RPS19</i>                 | 99             | 0.377 | 0.354 | 0.364 | 0.414 |
| <i>ORF1592</i>               | 1592           | 0.186 | 0.205 | 0.190 | 0.163 | <i>RPL16</i>                 | 194            | 0.400 | 0.412 | 0.371 | 0.418 |
| <i>ORF376</i>                | 376            | 0.188 | 0.277 | 0.215 | 0.072 | <i>RPS12</i>                 | 172            | 0.403 | 0.430 | 0.448 | 0.331 |
| <i>ORF61</i>                 | 61             | 0.109 | 0.148 | 0.098 | 0.082 | <i>RPS2</i>                  | 254            | 0.419 | 0.425 | 0.331 | 0.500 |
| <i>ORF399</i>                | 399            | 0.183 | 0.278 | 0.190 | 0.080 | <i>NAD7</i>                  | 432            | 0.464 | 0.475 | 0.373 | 0.544 |
| <i>ORF253</i>                | 253            | 0.158 | 0.292 | 0.123 | 0.059 | <i>NAD9</i>                  | 195            | 0.400 | 0.451 | 0.297 | 0.451 |
| <i>ORF69</i>                 | 69             | 0.121 | 0.188 | 0.130 | 0.043 | <i>SDH2</i>                  | 318            | 0.437 | 0.406 | 0.374 | 0.531 |
| <i>NAD1</i>                  | 380            | 0.214 | 0.268 | 0.289 | 0.084 | <i>COX11</i>                 | 283            | 0.395 | 0.445 | 0.350 | 0.389 |
| <i>NAD2</i>                  | 518            | 0.133 | 0.166 | 0.195 | 0.039 | Average                      | /              | 0.417 | 0.445 | 0.370 | 0.436 |
| <i>NAD3</i>                  | 124            | 0.161 | 0.218 | 0.202 | 0.065 |                              |                |       |       |       |       |
| <i>NAD4</i>                  | 465            | 0.164 | 0.196 | 0.237 | 0.060 |                              |                |       |       |       |       |
| <i>NAD4L</i>                 | 88             | 0.155 | 0.159 | 0.227 | 0.080 |                              |                |       |       |       |       |
| <i>NAD5</i>                  | 637            | 0.152 | 0.196 | 0.209 | 0.052 |                              |                |       |       |       |       |
| <i>NAD6</i>                  | 230            | 0.161 | 0.230 | 0.187 | 0.065 |                              |                |       |       |       |       |
| <i>NAD8</i>                  | 143            | 0.233 | 0.336 | 0.322 | 0.042 |                              |                |       |       |       |       |
| <i>NAD11</i>                 | 591            | 0.148 | 0.198 | 0.193 | 0.054 |                              |                |       |       |       |       |
| <i>COB</i>                   | 478            | 0.196 | 0.251 | 0.282 | 0.054 |                              |                |       |       |       |       |
| <i>COX1</i>                  | 663            | 0.248 | 0.324 | 0.326 | 0.095 |                              |                |       |       |       |       |
| <i>COX2</i>                  | 307            | 0.228 | 0.332 | 0.290 | 0.062 |                              |                |       |       |       |       |
| <i>COX3</i>                  | 316            | 0.190 | 0.282 | 0.222 | 0.066 |                              |                |       |       |       |       |
| <i>ATP1</i>                  | 557            | 0.266 | 0.357 | 0.343 | 0.097 |                              |                |       |       |       |       |
| <i>ATP3</i>                  | 333            | 0.172 | 0.228 | 0.207 | 0.081 |                              |                |       |       |       |       |
| <i>ATP6</i>                  | 261            | 0.143 | 0.188 | 0.199 | 0.042 |                              |                |       |       |       |       |
| <i>ATP8</i>                  | 126            | 0.124 | 0.127 | 0.167 | 0.079 |                              |                |       |       |       |       |
| <i>ATP9</i>                  | 72             | 0.296 | 0.361 | 0.431 | 0.097 |                              |                |       |       |       |       |
| <i>RPS3_a</i>                | 966            | 0.124 | 0.130 | 0.115 | 0.125 |                              |                |       |       |       |       |
| <i>RPS3_b</i>                | 1133           | 0.092 | 0.117 | 0.102 | 0.058 |                              |                |       |       |       |       |
| <i>RPS7</i>                  | 197            | 0.142 | 0.157 | 0.157 | 0.112 |                              |                |       |       |       |       |
| <i>RPS8</i>                  | 124            | 0.124 | 0.169 | 0.153 | 0.048 |                              |                |       |       |       |       |
| <i>RPS13</i>                 | 136            | 0.137 | 0.169 | 0.162 | 0.081 |                              |                |       |       |       |       |
| <i>RPS14</i>                 | 98             | 0.201 | 0.194 | 0.276 | 0.133 |                              |                |       |       |       |       |
| <i>RPL5</i>                  | 274            | 0.145 | 0.208 | 0.172 | 0.055 |                              |                |       |       |       |       |
| <i>RPL6</i>                  | 226            | 0.165 | 0.199 | 0.168 | 0.128 |                              |                |       |       |       |       |
| <i>RPL14</i>                 | 121            | 0.240 | 0.289 | 0.339 | 0.091 |                              |                |       |       |       |       |
| Average                      | /              | 0.160 | 0.203 | 0.195 | 0.082 |                              |                |       |       |       |       |

**Table S4. Posterior predictive tests of compositional heterogeneity in concatenated alignments of 19 mitochondrial proteins.**

| Taxa                                    | Original dataset |                    |              | Recoding using 6 Dayhoff groups |         |              | GenBank accession number              |
|-----------------------------------------|------------------|--------------------|--------------|---------------------------------|---------|--------------|---------------------------------------|
|                                         | z-score          | p-value            | Significance | z-score                         | p-value | Significance |                                       |
| <i>Acrasis kona</i>                     | 19.041           | 0                  | *            | 21.938                          | 0       | *            | KJ679272                              |
| <i>Naegleria gruberi</i>                | 13.514           | 0                  | *            | 18.449                          | 0       | *            | AF288092                              |
| <i>Acanthamoeba castellanii</i>         | 16.058           | 0                  | *            | 19.052                          | 0       | *            | NC_001637                             |
| <i>Agrobacterium radiobacter</i>        | 8.507            | 0.004              | *            | 4.673                           | 0.01    | *            | NC_011985,<br>NC_011983               |
| <i>Allomyces macrogynus</i>             | 6.614            | 0                  | *            | 3.017                           | 0.006   | *            | NC_001715                             |
| <i>Andalucia godoyi</i>                 | 5.544            | 0.006              | *            | -1.126                          | 0.896   |              | KC353352                              |
| <i>Azospirillum brasilense</i>          | 8.385            | 0                  | *            | 4.941                           | 0.004   | *            | NC_016617                             |
| <i>Bigelowiella natans</i>              | 7.994            | 0.008              | *            | 6.811                           | 0.004   | *            | HQ840955                              |
| <i>Bradyrhizobium japonicum</i>         | 7.958            | 0.008              | *            | 6.435                           | 0.004   | *            | NC_004463                             |
| <i>Capsaspora owczarzaki</i>            | 8.574            | 0                  | *            | 5.958                           | 0.008   | *            | KC573038                              |
| <i>Chaetosphaeridium globosum</i>       | 2.876            | 0.024              | *            | 1.479                           | 0.084   |              | NC_004118                             |
| <i>Chattonella marina</i>               | 10.989           | 0                  | *            | 0.896                           | 0.158   |              | NC_013837                             |
| <i>Chondrus crispus</i>                 | 9.947            | 0                  | *            | 3.13                            | 0.006   | *            | NC_001677                             |
| <i>Cyanidioschyzon merolae</i>          | 13.561           | 0                  | *            | 7.577                           | 0       | *            | NC_000887                             |
| <i>Cyanophora paradoxa</i>              | 15.842           | 0                  | *            | 6.322                           | 0.004   | *            | NC_017836                             |
| <i>Desmarestia viridis</i>              | 5.165            | 0.008              | *            | 1.21                            | 0.116   |              | NC_007684                             |
| <i>Dictyostelium discoideum</i>         | 15.055           | 0                  | *            | 19.753                          | 0       | *            | NC_000895                             |
| <i>Ehrlichia canis</i>                  | 11.884           | 0                  | *            | 5.829                           | 0.002   | *            | NC_007354                             |
| <i>Emiliana huxleyi</i>                 | 6.772            | 0                  | *            | 1.073                           | 0.132   |              | NC_005332                             |
| <i>Geodia neptuni</i>                   | 3.431            | 0                  | *            | 3.624                           | 0.002   | *            | NC_006990                             |
| <i>Glaucocystis nostochinearum</i>      | 12.845           | 0                  | *            | 9.692                           | 0       | *            | NC015117                              |
| <i>Hartmannella vermiformis</i>         | 10.794           | 0.002              | *            | 11.958                          | 0       | *            | NC_013986                             |
| <i>Hemiselmis andersenii</i>            | 4.129            | 0.004              | *            | 0.124                           | 0.368   |              | NC_010637                             |
| <i>Histiona aroides</i>                 | 3.225            | 0.006              | *            | 0.08                            | 0.432   |              | KC353353                              |
| <i>Jakoba bahamiensis</i>               | 2.603            | 0.026              | *            | -0.994                          | 0.842   |              | KC353354                              |
| <i>Jakoba libera</i>                    | 6.96             | 0.006              | *            | 0.753                           | 0.216   |              | KC353355                              |
| <i>Magnetospirillum magnetotacticum</i> | 7.81             | 0.006              | *            | 7.676                           | 0.004   | *            | NZ_AAAP0000<br>0000                   |
| <i>Magnetococcus</i> sp.                | 8.127            | 0.008              | *            | 4.886                           | 0.01    | *            | NC_008576                             |
| <i>Malawimonas californiana</i>         | 14.887           | 0                  | *            | 9.162                           | 0       | *            | unpublished                           |
| <i>Malawimonas jakobiformis</i>         | 15.177           | 0                  | *            | 5.252                           | 0       | *            | NC_002553                             |
| <i>Marchantia polymorpha</i>            | 1.434            | 0.082              |              | 0.887                           | 0.174   |              | NC_001660                             |
| <i>Mezorhizobium loti</i>               | 6.306            | 0.008              | *            | 5.896                           | 0.008   | *            | NC_002682,<br>NC_002679,<br>NC_002678 |
| <i>Mesostigma viride</i>                | 9.064            | 0.002              | *            | 1.211                           | 0.116   |              | NC_008240                             |
| <i>Micavibrio aeruginosavorus</i>       | 9.456            | 0.008 <sup>6</sup> | *            | 3.445                           | 0.018   | *            | NC_016026                             |

|                                          |        |       |   |        |       |   |                     |
|------------------------------------------|--------|-------|---|--------|-------|---|---------------------|
| <i>Midichloria mitochondrii</i>          | 4.18   | 0.008 | * | 0.146  | 0.34  |   | NC_015722           |
| <i>Monosiga brevicollis</i>              | 5.684  | 0.002 | * | 2.249  | 0.034 | * | NC_004309           |
| <i>Neorickettsia sennetsu</i>            | 4.089  | 0.004 | * | 3.545  | 0.008 | * | NC_007798           |
| <i>Nephroselmis olivacea</i>             | 1.882  | 0.042 | * | 1.205  | 0.11  |   | NC_008239           |
| <i>Novosphingobium aromaticivorans</i>   | 6.526  | 0.016 | * | 9.517  | 0.004 | * | NC_007794           |
| <i>Orientia tsutsugamushi</i> str. Ideda | 17.564 | 0     | * | 8.216  | 0     | * | NC_010793           |
| <i>Pavlova lutheri</i>                   | 6.215  | 0.002 | * | -0.773 | 0.784 |   | HQ908424            |
| <i>Phytophthora infestans</i>            | 14.909 | 0     | * | 14.167 | 0     | * | NC_002387           |
| <i>Porphyra purpurea</i>                 | 4.654  | 0     | * | -0.552 | 0.716 |   | NC_002007           |
| <i>Prototheca wickerhamii</i>            | 1.884  | 0.04  | * | 0.96   | 0.168 |   | NC_001613           |
| <i>Reclinomonas americana</i>            | 1.288  | 0.106 |   | -0.473 | 0.652 |   | NC_001823           |
| <i>Rhizopus oryzae</i>                   | 3.762  | 0.014 | * | 4.7    | 0.008 | * | NC_006836           |
| <i>Rhodospirillum rubrum</i>             | 10.257 | 0.002 | * | 8.326  | 0     | * | NC_007643           |
| <i>Rhodospirillum centenum</i>           | 9.187  | 0.004 | * | 5.575  | 0.006 | * | NC_011420           |
| <i>Rhodomonas salina</i>                 | 13.292 | 0     | * | 20.171 | 0     | * | NC_002572           |
| <i>Rickettsia prowazekii</i> str. Madrid | 13.246 | 0     | * | 6.81   | 0     | * | NC_000963           |
| <i>Seculamonas ecuadoriensis</i>         | 0.507  | 0.258 |   | 0.053  | 0.432 |   | KC353359            |
| <i>Thalassiosira pseudonana</i>          | 9.779  | 0     | * | 2.922  | 0.014 | * | NC_007405           |
| <i>Tistrella mobilis</i>                 | 8.045  | 0.004 | * | 6.099  | 0.008 | * | NC_017966           |
| <i>Alphaproteobacterium BAL199</i>       | 6.301  | 0.006 | * | 5.105  | 0.004 | * | NZ_ABHC0100<br>0000 |
| Global test                              | 33.573 | 0     |   | 22.297 | 0     |   |                     |

**Table S5. Comparison of 11 putative nuclear encoded mitochondrial proteins (NcMt) in *Acrisis kona* and their counterparts in the *Naegleria* spp. mtDNAs.**

| Protein | Species           | Length<br>(aa) | TargetP 1.1 |                        | MitoProt II |                        | Predotar | Significance <sup>1</sup> |
|---------|-------------------|----------------|-------------|------------------------|-------------|------------------------|----------|---------------------------|
|         |                   |                | P value     | Cleavage<br>length(aa) | P value     | Cleavage<br>length(aa) | P value  |                           |
| RPS10   | <i>A. kona</i>    | 227            | 0.647       | 17                     | 0.900       | 13                     | 0.76     | +++                       |
|         | <i>N. gruberi</i> | 220            | 0.381       | 26                     | 0.999       | 77                     | 0.26     | +                         |
|         | <i>N. fowleri</i> | 77             | 0.393       | n.a.                   | 0.150       | n.a.                   | 0.65     | +                         |
| RPL11   | <i>A. kona</i>    | 200            | 0.669       | 16                     | 0.978       | 54                     | 0.60     | +++                       |
|         | <i>N. gruberi</i> | 148            | 0.272       | n.a.                   | 0.181       | n.a.                   | 0.32     | —                         |
|         | <i>N. fowleri</i> | 145            | 0.390       | 82                     | 0.625       | n.a.                   | 0.22     | +                         |
| RPL2    | <i>A. kona</i>    | 256            | 0.913       | 62                     | 0.994       | 52                     | 0.77     | +++                       |
|         | <i>N. gruberi</i> | 268            | 0.310       | n.a.                   | 0.565       | n.a.                   | 0.10     | +                         |
|         | <i>N. fowleri</i> | 266            | 0.182       | n.a.                   | 0.930       | n.a.                   | 0.35     | +                         |
| RPS19   | <i>A. kona</i>    | 99             | 0.708       | 14                     | 0.981       | n.a.                   | 0.56     | +++                       |
|         | <i>N. gruberi</i> | 88             | 0.633       | 54                     | 0.879       | n.a.                   | 0.05     | ++                        |
|         | <i>N. fowleri</i> | 87             | 0.387       | n.a.                   | 0.675       | n.a.                   | 0.02     | +                         |
| RPL16   | <i>A. kona</i>    | 194            | 0.681       | 110                    | 0.992       | 45                     | 0.83     | +++                       |
|         | <i>N. gruberi</i> | 141            | 0.412       | n.a.                   | 0.939       | n.a.                   | 0.47     | +                         |
|         | <i>N. fowleri</i> | 141            | 0.648       | 16                     | 0.989       | n.a.                   | 0.47     | ++                        |
| RPS12   | <i>A. kona</i>    | 172            | 0.919       | 49                     | 0.999       | 160                    | 0.86     | +++                       |
|         | <i>N. gruberi</i> | 128            | 0.294       | n.a.                   | 0.932       | 97                     | 0.33     | +                         |
|         | <i>N. fowleri</i> | 128            | 0.342       | n.a.                   | 0.364       | 15                     | 0.47     | —                         |
| RPS2    | <i>A. kona</i>    | 254            | 0.341       | n.a.                   | 0.849       | 101                    | 0.0      | +                         |
|         | <i>N. gruberi</i> | 264            | 0.206       | n.a.                   | 0.950       | n.a.                   | 0.16     | +                         |
|         | <i>N. fowleri</i> | 262            | 0.192       | n.a.                   | 0.566       | 27                     | 0.03     | +                         |
| NAD7    | <i>A. kona</i>    | 432            | 0.674       | 30                     | 0.586       | n.a.                   | 0.83     | +++                       |
|         | <i>N. gruberi</i> | 395            | 0.094       | n.a.                   | 0.082       | 38                     | 0.0      | —                         |
|         | <i>N. fowleri</i> | 395            | 0.066       | n.a.                   | 0.155       | n.a.                   | 0.0      | —                         |
| NAD9    | <i>A. kona</i>    | 195            | 0.334       | n.a.                   | 0.817       | n.a.                   | 0.50     | ++                        |
|         | <i>N. gruberi</i> | 186            | 0.551       | 36                     | 0.911       | n.a.                   | 0.01     | ++                        |
|         | <i>N. fowleri</i> | 185            | 0.294       | 23                     | 0.636       | 23                     | 0.0      | +                         |
| SDH2    | <i>A. kona</i>    | 318            | 0.838       | 26                     | 0.933       | 40                     | 0.65     | +++                       |
|         | <i>N. gruberi</i> | 270            | 0.133       | n.a.                   | 0.113       | n.a.                   | 0.02     | —                         |
|         | <i>N. fowleri</i> | 270            | 0.138       | 22                     | 0.756       | n.a.                   | 0.04     | +                         |
| COX11   | <i>A. kona</i>    | 283            | 0.804       | 14                     | 0.948       | 22                     | 0.86     | +++                       |
|         | <i>N. gruberi</i> | 222            | 0.015       | 21                     | 0.327       | n.a.                   | 0.01     | —                         |
|         | <i>N. fowleri</i> | 224            | 0.008       | 25                     | 0.076       | n.a.                   | 0.01     | —                         |

<sup>1</sup>: (+): one of the predictions have P>0.50; (—): none of the predictions have P>0.50



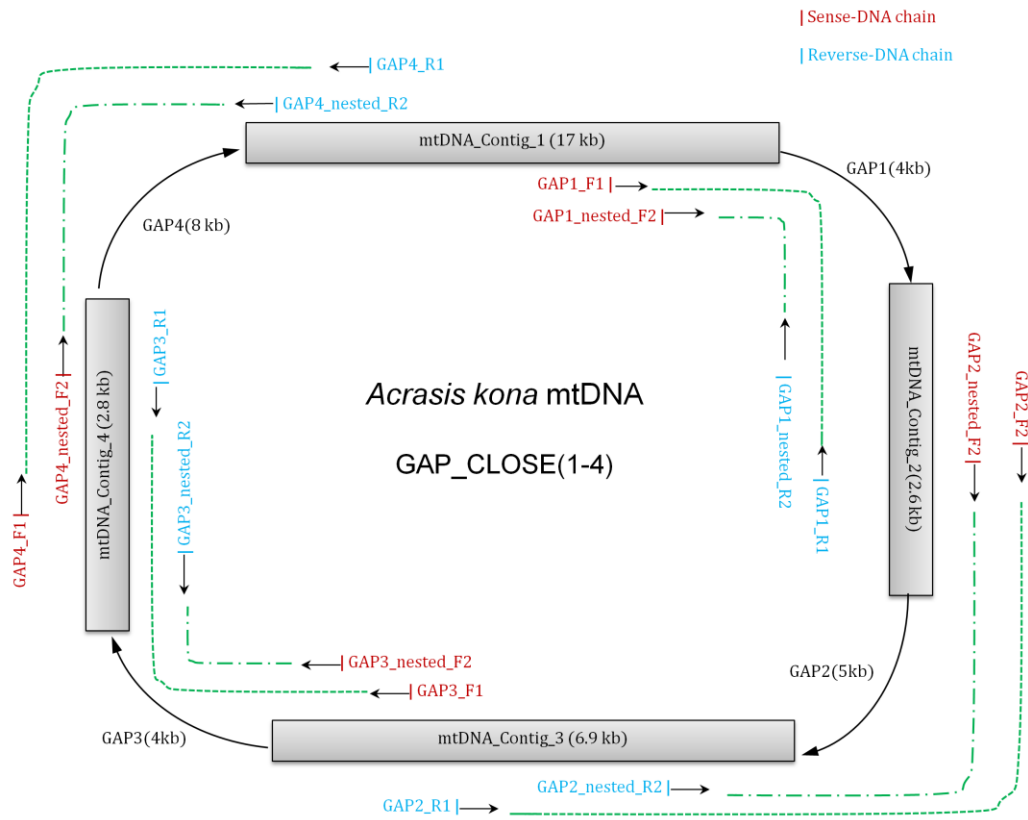

Fig S1. A schematic map of gap-closing of *Acrasis kona* mtDNA based on long-rang PCR.

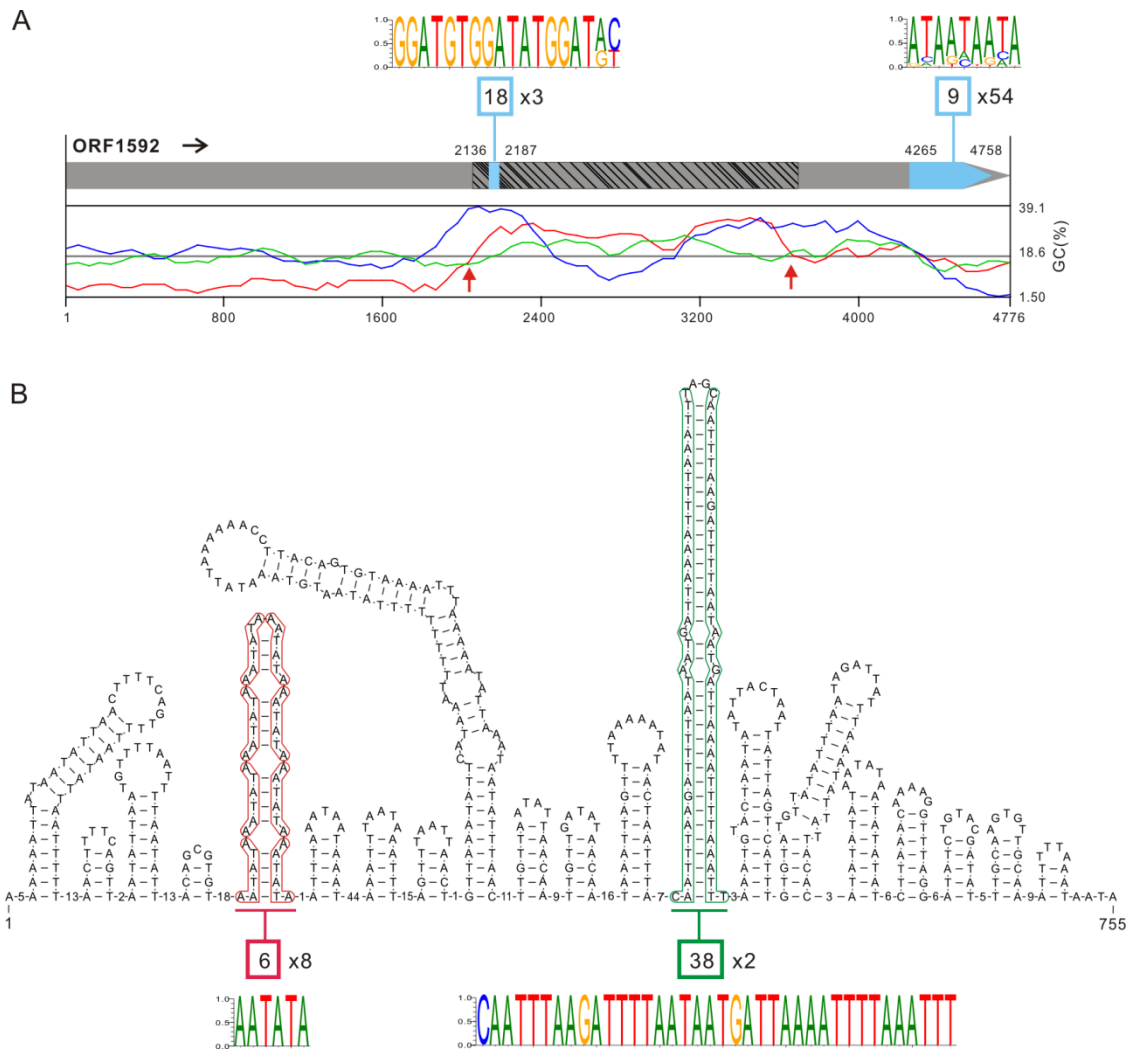

Fig S2. Tandemly repeated regions in *Acrasis kona* mtDNA. (A) Two tandem repeats occur in the largest putative protein coding gene (ORF1592). The region of heterogeneous GC content is shaded. GC Frame plot of GC content at the 1<sup>st</sup>, 2<sup>ed</sup> and 3<sup>rd</sup> codon positions is shown below with a window size of 400. (B) The nucleotide repeat and the potential secondary structures in the largest noncoding region (755 bp) of *A. kona* mtDNA. The period size of nucleotide repeat is indicated in the box.



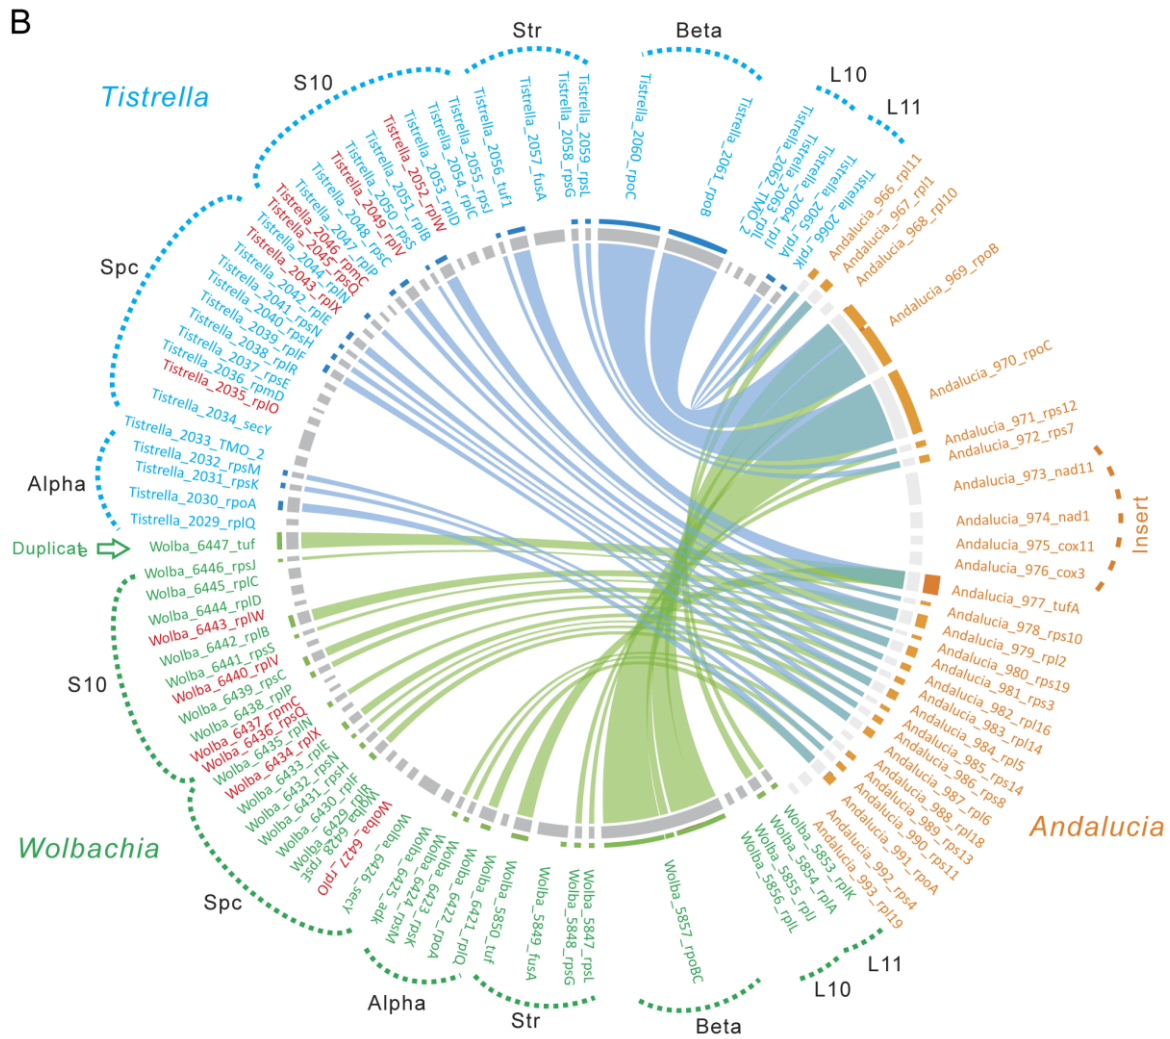

(Fig S3. Continued)

Fig S3. Comparison of ribosomal protein operon gene order among representative  $\alpha$ -proteobacteria and jakobids. (A) Sequences identified by BLASTp search of four *Rickettsiales* species against the free-living  $\alpha$ -proteobacteria *Tistrella mobilis* (NC\_017956) as the reference with a threshold of  $1e^{-10}$ . (B) Sequences identified by BLASTp search of *Rickettsiales* species *Wolbachia* and *Tistrella mobilis* against the jakobid species *Andalučia goyodi* (KC353352) as the reference with a threshold of  $1e^{-10}$ . The range of each protein operon is indicated with dotted line. Names of genes with discrepancy of their presence in the *Rickettsiales* species in comparison with Burger et al. 2013 are indicated in red. Genbank accession numbers of the genomes: NC\_002978 (*Wolbachia* endosymbiont of *Drosophila melanogaster*), NC\_010793 (*Orientia tsutsugamushi*), NC\_000963 (*Rickettsia prowazekii*) and NC\_015722 (*Candidatus Midichloria mitochondrii*).

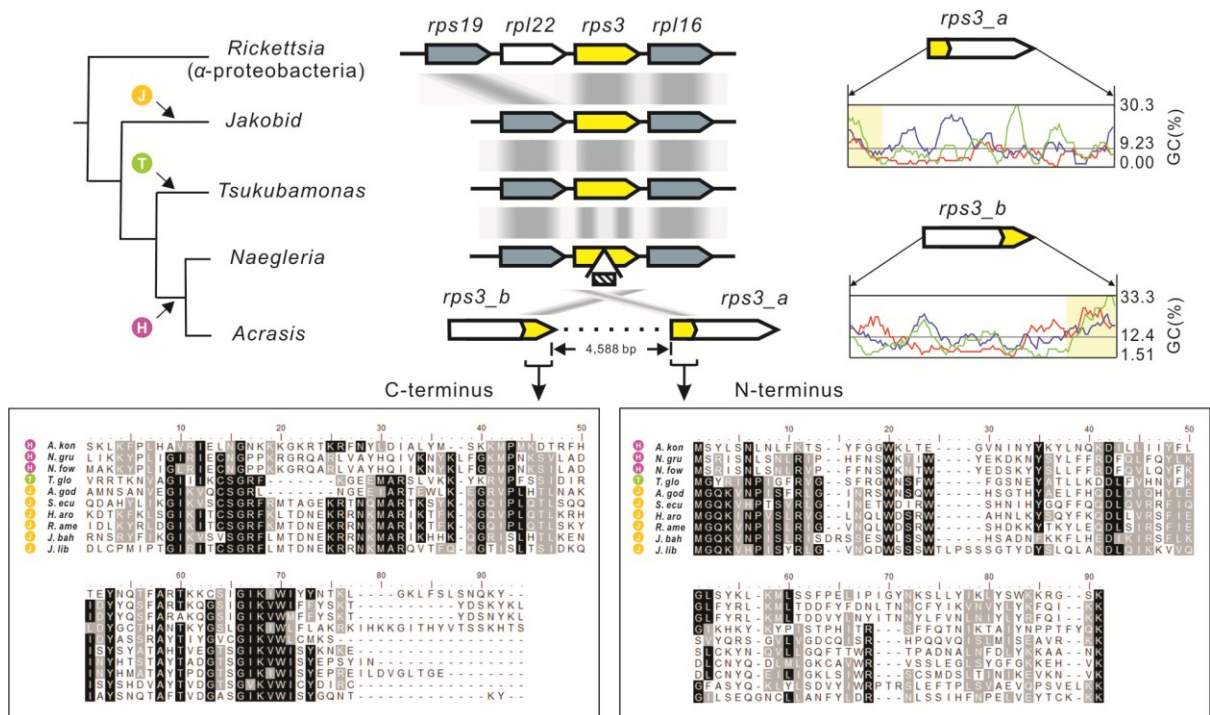

Fig S4. A split *rps3* gene in *Acrasis kona* mtDNA. The *rps3* gene organization in the α-proteobacteria (*Rickettsia*), Jakobida, Tsukubamonadida and Heterolobosea are shown next to a schematic species phylogeny. The *Naegleria rps3* gene has long insertions in the middle that are poorly aligned. The *Acrasis rps3* gene is split into two ORFs (*rps3\_a* and *rps3\_b*), both with terminal extensions. Grey intensity reflects the degree of similarity between the gene orthologs. Multiple sequence alignments for the regions corresponding to the two halves of *rps3* are shown below in boxes. Residues with 100% identity are shaded in black, with over 60% similarity shaded in grey. The GC content of *Acrasis rps3\_a* and *rps3\_b* at each codon position is shown as determined by GC Frame plot (window size 200).

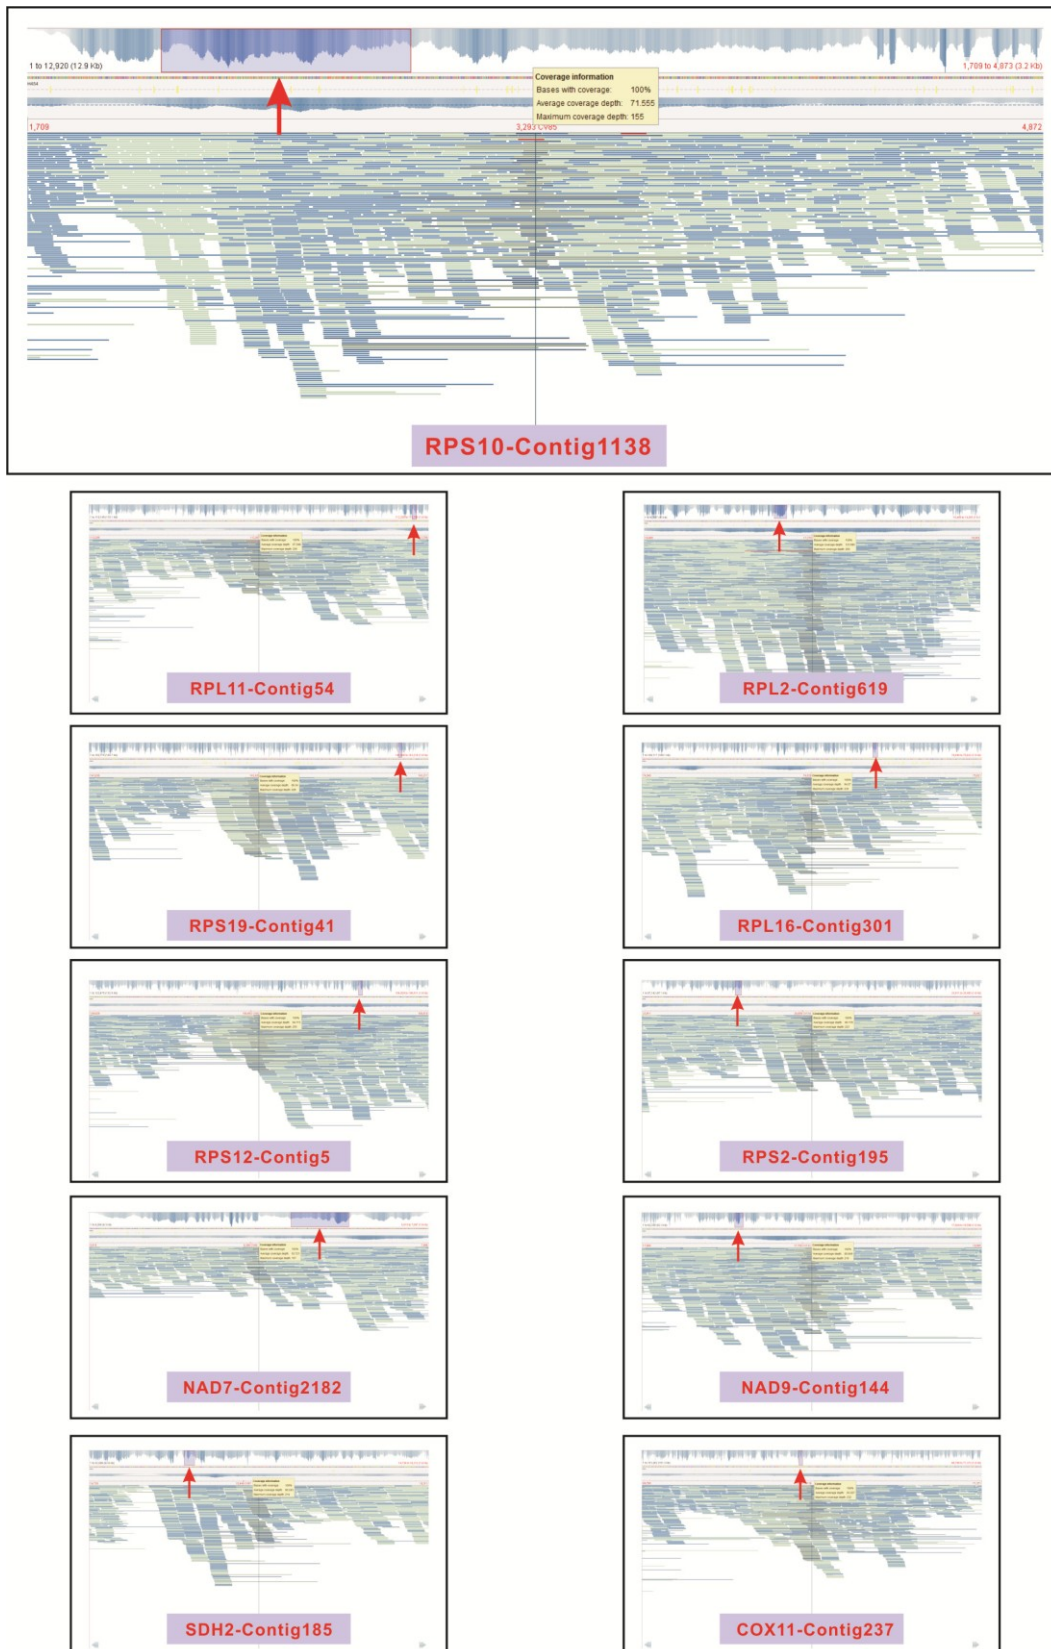

Fig S5. Assembly coverage plots for the 11 putative nuclear encoded mitochondrial protein (NcMt) genes in the *Acrasis kona* nuclear contigs. The corresponding loci of each NcMt gene candidate is indicated with red arrow.

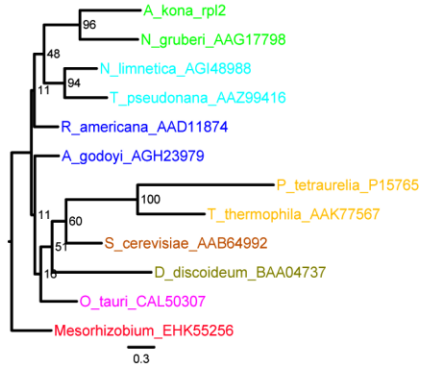

A. rpl12 (223 aligned positions)

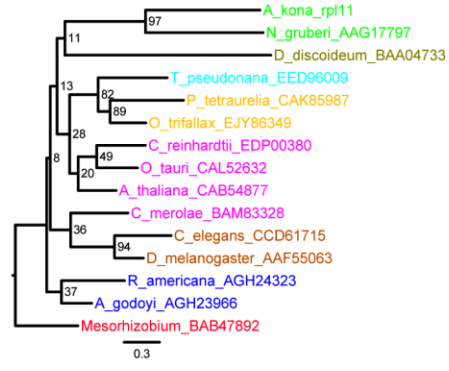

B. rpl11 (126 aligned positions)

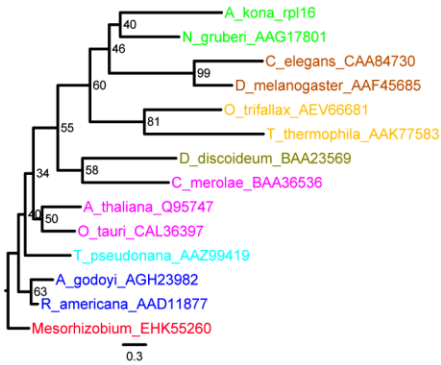

C. rpl16 (118 aligned positions)

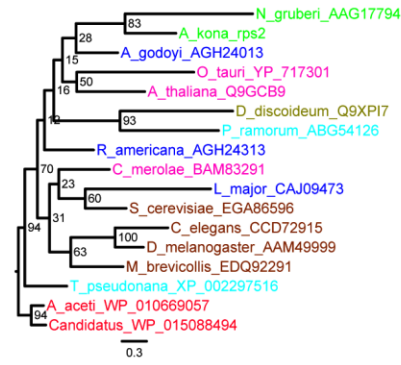

D. rps2 (171 aligned positions)

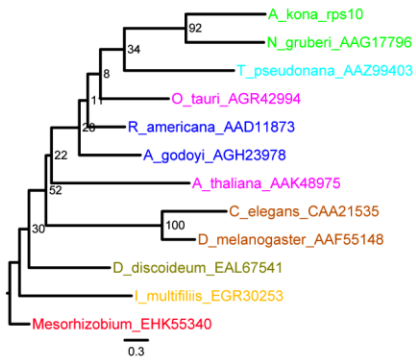

E. rps10 (99 aligned positions)

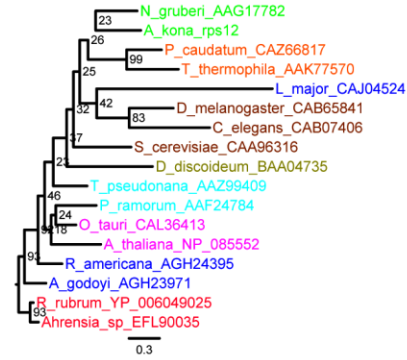

F. rps12 (121 aligned positions)

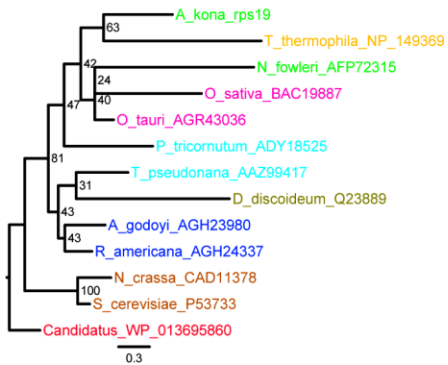

G. rps19 (80 aligned positions)

(Fig S6.)

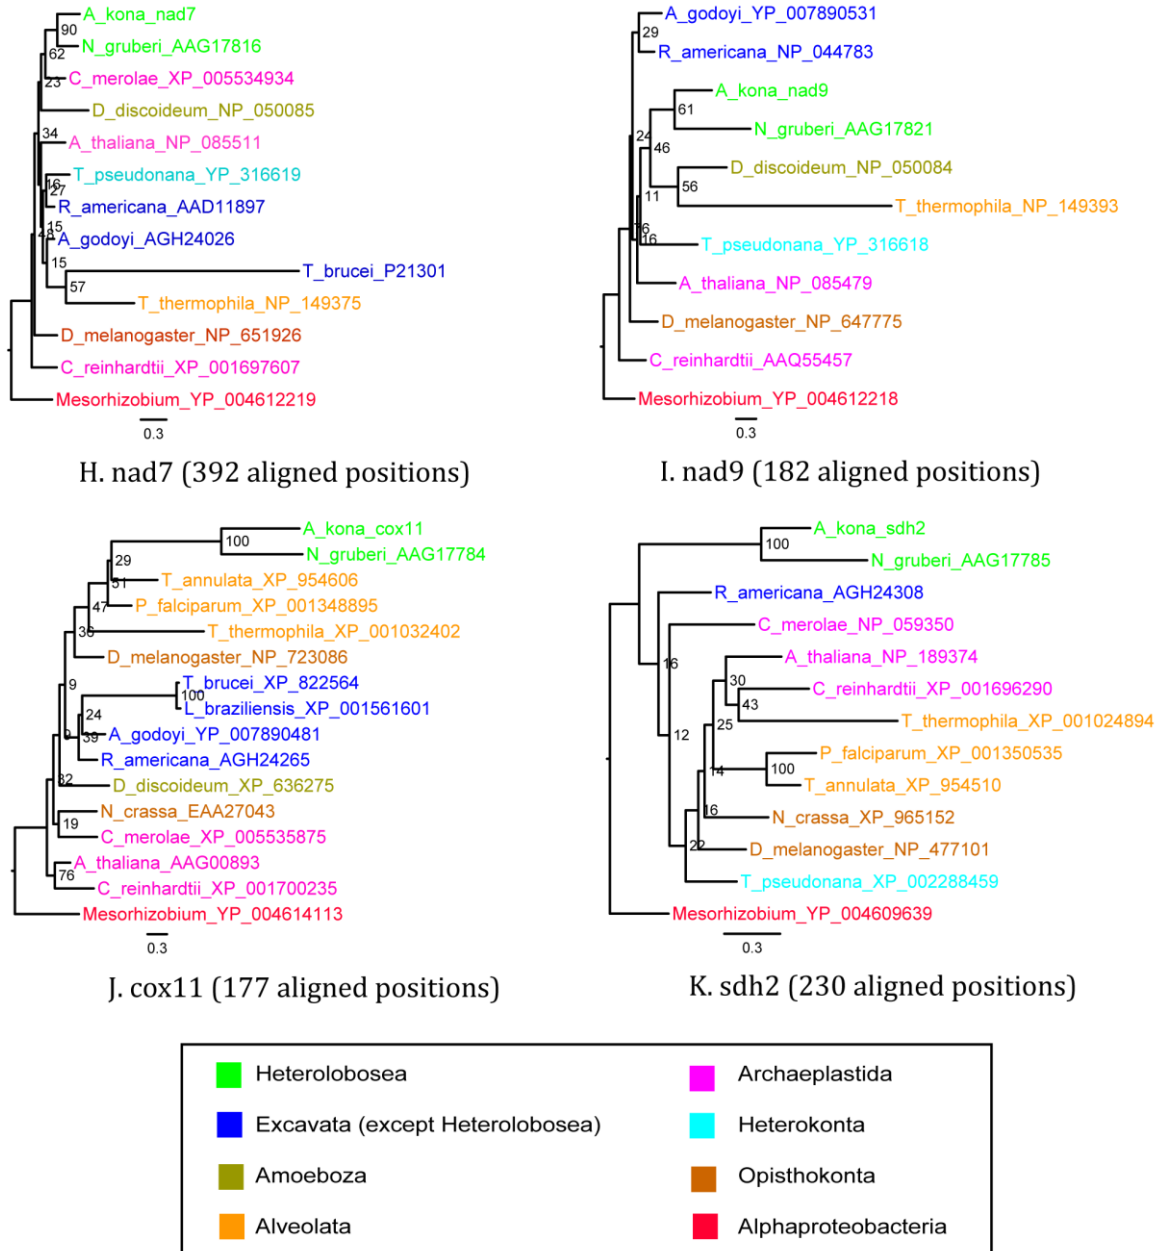

(Fig S6. Continued)

Fig S6. Phylogenies of 11 *Acrasis kona* putative nuclear-encoded mitochondrial proteins (NcMt). Trees were derived by maximum likelihood analysis of amino acid sequences with the number of aligned positions for individual data sets indicated below the respective trees. Numbers indicate bootstrap values from 1000 replicates of rapid maximum likelihood bootstrapping with RAXML v7.3.3 (Stamatakis 2006). Taxa were selected to give a broad sampling of eukaryotes based on (Desmond et al. 2011) but with emphasis on Discoba. Taxon labels are color coded as indicate at the bottom right. Trees are drawn to scale as indicated by the scale bars.



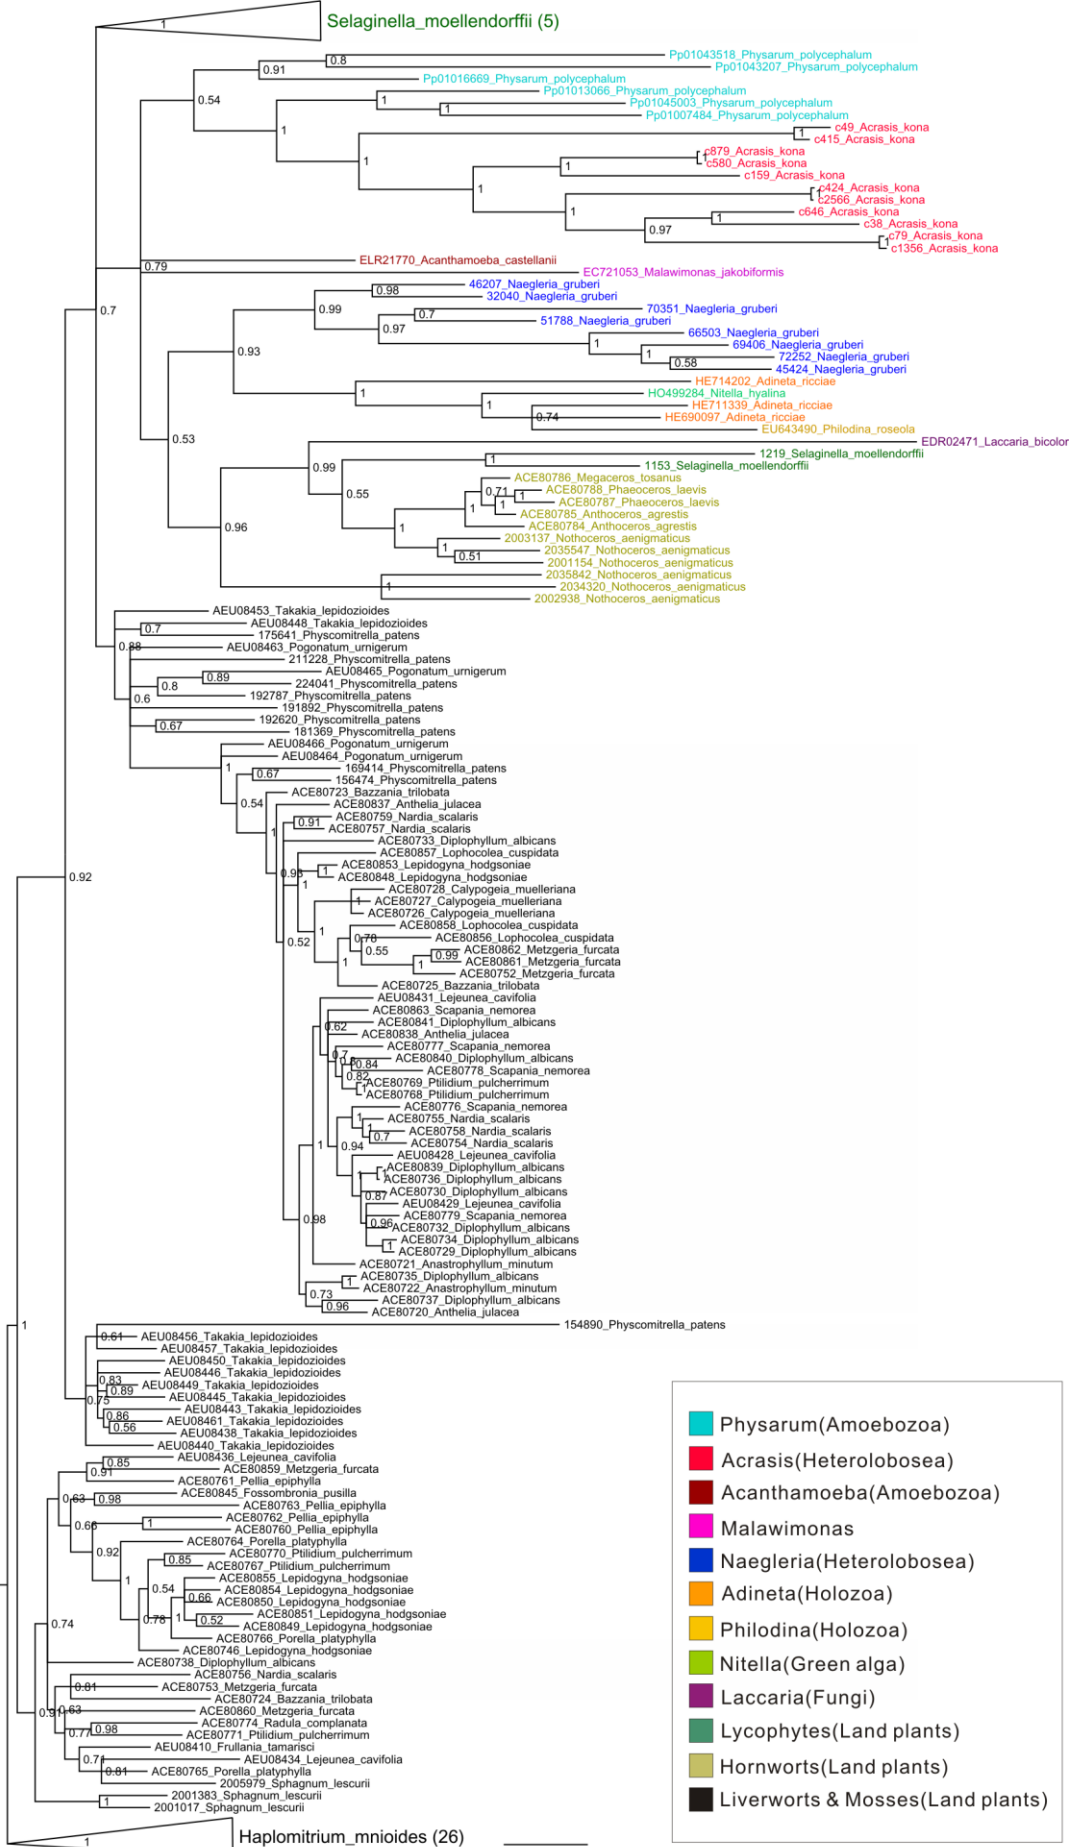

Fig S7. Bayesian phylogeny of the E/E+/DYW domain of the DYW-type PPR proteins. Taxa include a broad sampling of early branching land plants [Liverworts (Haplomitriopsida and Jungermanniopsida), Mosses (Bryopsida, Polytrichopsida, Sphagnopsida and Takakiopsida), Hornworts (Anthocerotopsida) and Lycophytes (Isoetopsida)], and those outside land plants [Heterolobosea (*Acrasis kona*; *Naegleria gruberi*), Amoebozoa (*Acanthamoeba castellanii*; *Physarum polycephalum*), Metazoa (*Adineta ricciae*; *Philodina roseola*), Fungi (*Laccaria bicolor*), Charophyta (*Nitella hyaline*), *Malawimonas jakobiformis*]. The candidate protein sequences from species outside of land plants were retrieved based on (Iyer et al. 2011; Schallenberg-Rudinger et al. 2013). The tree shown was derived using the program PhyloBayes v1.4 (Lartillot et al, 2009) using an alignment of 201 universally-aligned amino acid positions. Values correspond to posterior probabilities; all nodes with posterior probability less than 0.5 are collapsed. Taxon labels include Genbank accession numbers and are color coded according to the key at the bottom right. The tree is drawn to scale as indicated by the scale bar.

## References

1. Burger G, Gray MW, Forget L, Lang BF. 2013. Strikingly bacteria-like and gene-rich mitochondrial genomes throughout jakobid protists. *Genome Biol Evol* 5: 418-438.
2. Desmond E, Brochier-Armanet C, Forterre P, Gribaldo S. 2011. On the last common ancestor and early evolution of eukaryotes: reconstructing the history of mitochondrial ribosomes. *Res Microbiol* 162: 53-70.
3. Iyer LM, Zhang D, Rogozin IB, Aravind L. 2011. Evolution of the deaminase fold and multiple origins of eukaryotic editing and mutagenic nucleic acid deaminases from bacterial toxin systems. *Nucleic Acids Res* 39: 9473-9497.
4. Lartillot N, Lepage T, Blanquart S. 2009. PhyloBayes 3: a Bayesian software package for phylogenetic reconstruction and molecular dating. *Bioinformatics* 25: 2286-2288.
5. Schallenberg-Rudinger M, Lenz H, Polsakiewicz M, Gott JM, Knoop V. 2013. A survey of PPR proteins identifies DYW domains like those of land plant RNA editing factors in diverse eukaryotes. *RNA Biol* 10: 1549-1556.
6. Stamatakis A. 2006. RAxML-VI-HPC: maximum likelihood-based phylogenetic analyses with thousands of taxa and mixed models. *Bioinformatics* 22: 2688-2690.
